# Supplementary material
Source: PubMed Central journal article supplement (PMC8393239)
Supplement: NIHMS1734076-supplement-1.pdf [file NIHMS1734076-supplement-1.pdf]

Cell Reports, Volume 36

**Supplemental information**

**Tribbles pseudokinase NIPI-3 regulates  
intestinal immunity in *Caenorhabditis elegans*  
by controlling SKN-1/Nrf activity**

**Chenggang Wu, Ozgur Karakuzu, and Danielle A. Garsin**

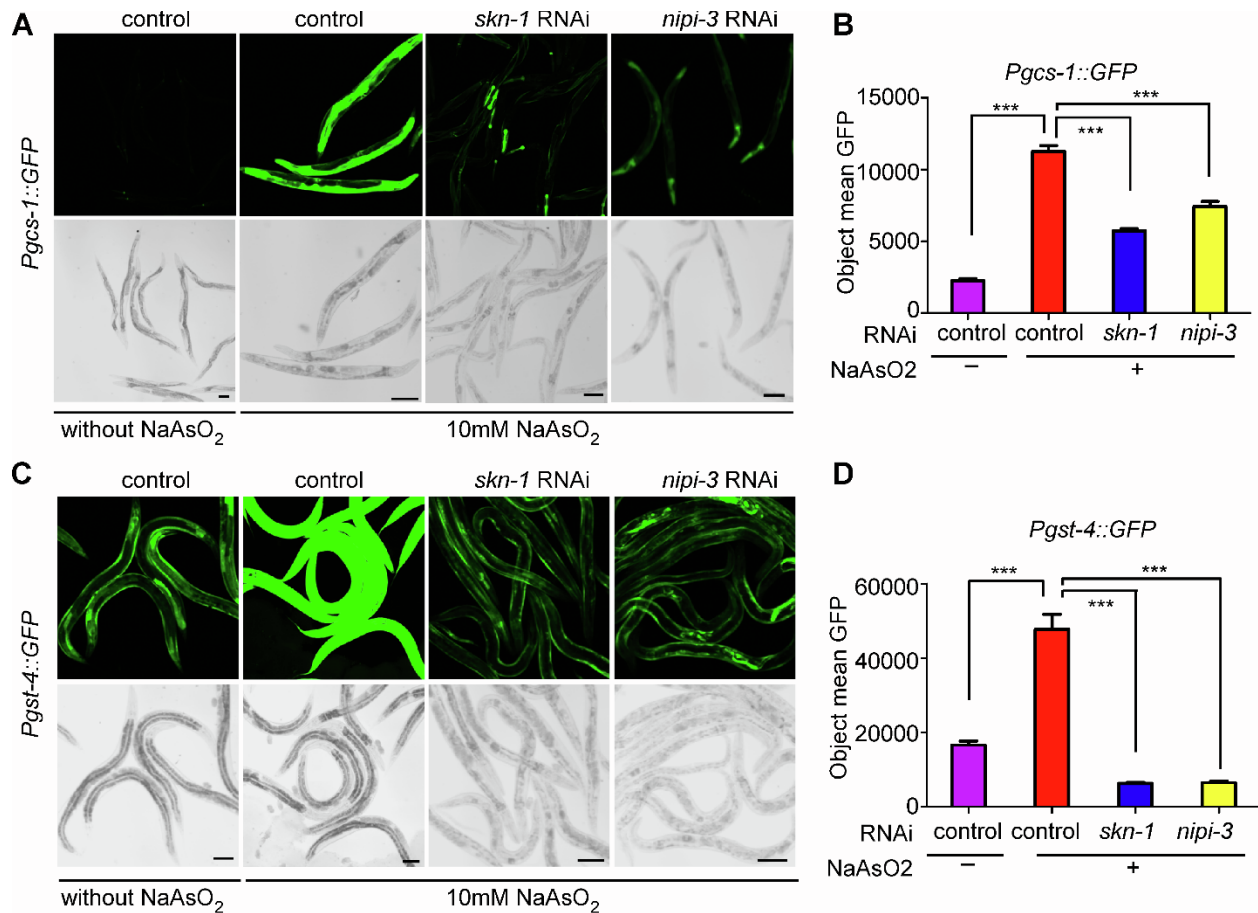

**Figure S1: Loss of NIPI-3 reduces the expression of SKN-1 regulated genes in response to oxidant. Related to Figure 1.** Fluorescence microscopy was used to analyze *Pgcs-1::gfp* (A) and *Pgst-4::gfp* (C) expression in wild type animals exposed to vector control, *skn-1* or *nipi-3* RNAi prior to a five hour exposure to 10 mM sodium arsenate in NGM plates (A) or M9 buffer (B). *Pgcs-1::gfp* and *Pgst-4::gfp* expression was less induced in the intestines of animals treated with *skn-1* and *nipi-3* RNAi as compared to vector control, and was comparable to the level of the control animals not exposed to oxidant. The scale bars are 100  $\mu$ m. The amount of GFP fluorescence produced by animals containing the *Pgcs-1::gfp* reporter (B) and the *Pgst-4::gfp* reporter (D) was quantified. The average gene expression of biological replicates is shown, and the error bars represent the SEM. \* $p < 0.05$ , \*\* $p < 0.01$ , \*\*\* $p < 0.001$ .

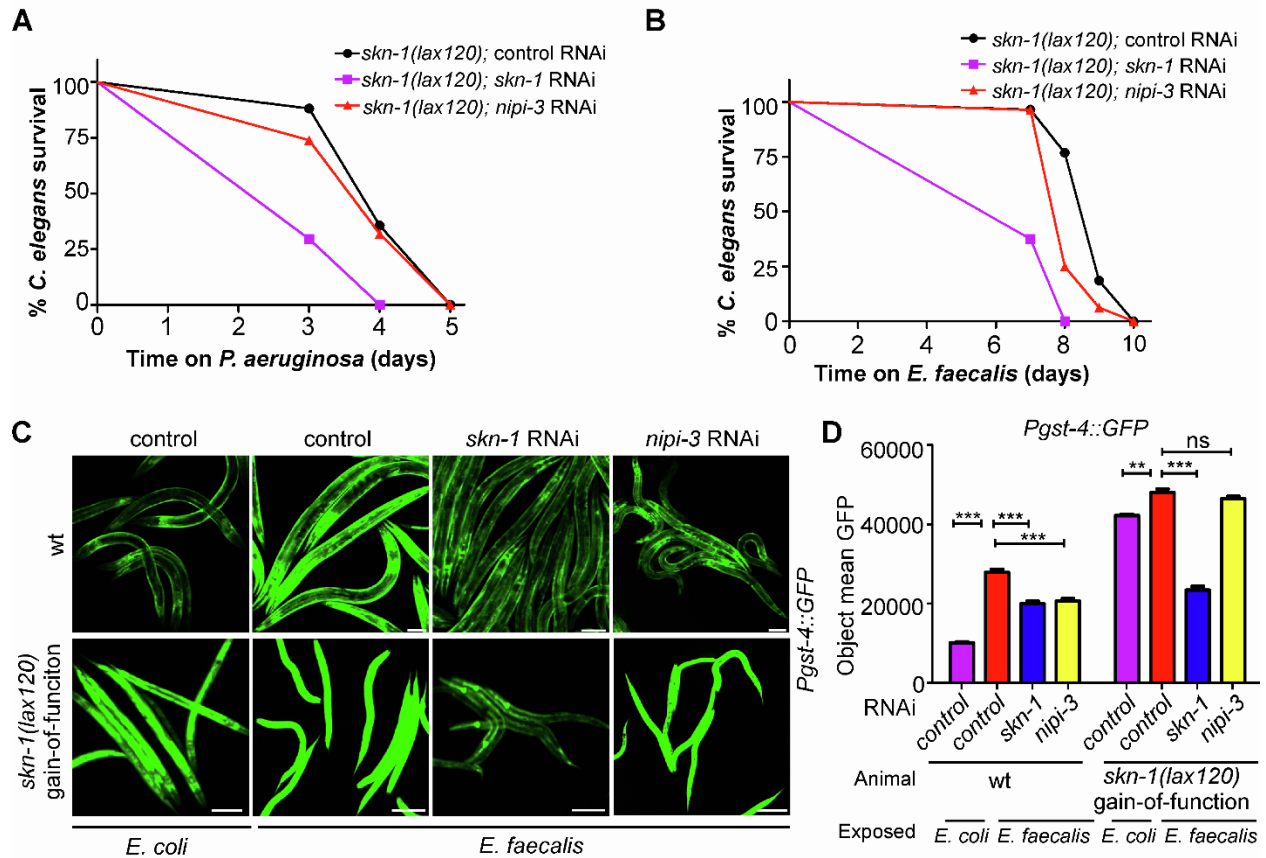

**Figure S2: A *skn-1* gain-of-function mutant is unaffected by loss of NIPI-3.** Related to Figure 2. *skn-1* gain-of-function animals (*skn-1(lax120)*) exposed to vector control, *skn-1*, or *nipi-3* RNAi prior to exposure to *P. aeruginosa* (A) or *E. faecalis* (B).  $p < 0.0001$  for *skn-1* RNAi compared to *skn-1* or *nipi-3* RNAi.  $p = ns$  and  $p < 0.05$  for control vs. *nipi-3* RNAi on *P. aeruginosa* and *E. faecalis* respectively. Median survival and  $p$  values are listed in Table S1 along with replicates of all experiments. (C) Confocal microscopy of vector control, *skn-1*, or *nipi-3* RNAi treated *skn-1(lax120)* animals carrying *Pgst-4::gfp* after exposure to *E. faecalis* or *E. coli* for 16 hours. The images are representative of three independent experiments ( $n > 150$  animals). Scale bars indicate 100  $\mu$ m. (D) Quantification of mean GFP fluorescence for the animals in (C). Three biological replicates with at least 50 worms/replicate were analyzed. Error bars represent the SEM. \* $p < 0.05$ , \*\* $p < 0.01$ , \*\*\*  $p < 0.001$ , ns not significant.

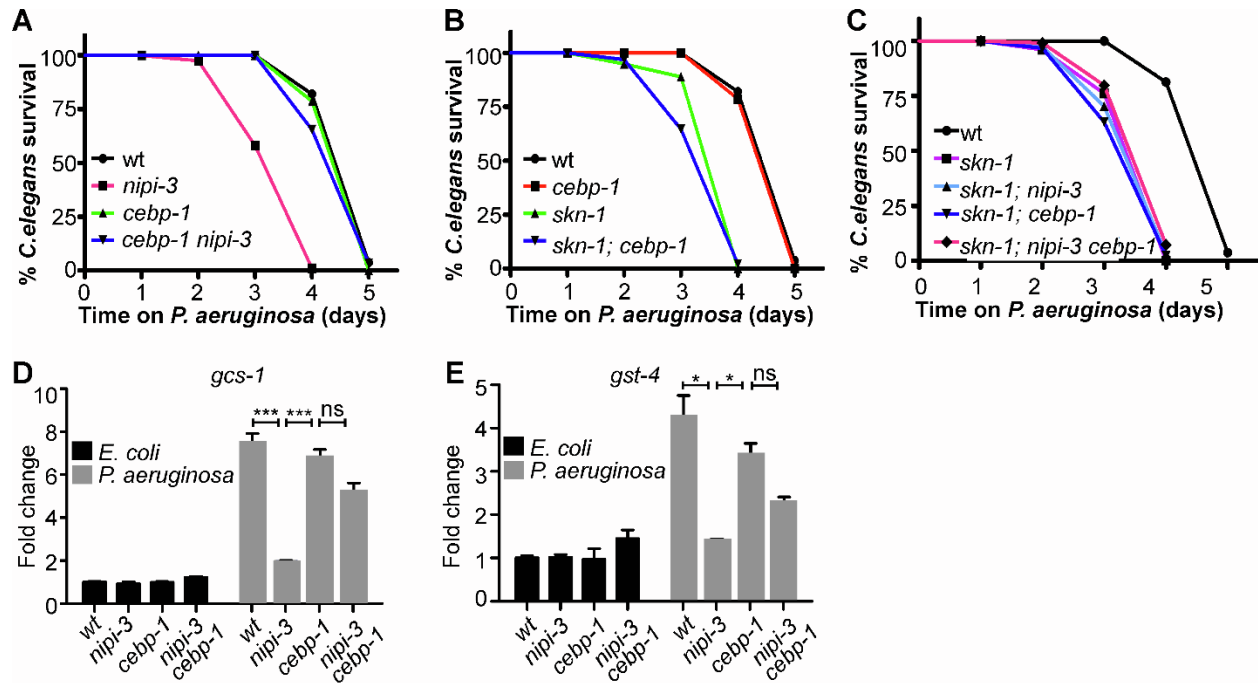

**Figure S3: NIPI-3's effect on SKN-1 activation requires CEBP-1. Related to Figure 3. (A)** Survival curves of wild type, *nipi-3(fr4)*, *cebp-1(tm2807)* and *nipi-3(fr4) cebp-1(tm2807)* on *P. aeruginosa* PA14.  $p < 0.0001$  for *nipi-3* compared to all other strains.  $p = ns$  for wild type, *cebp-1* and *cebp-1 nipi-3* compared to each other. **(B)** Survival curves of wild type, *cebp-1(tm2807)*, *skn-1(zu135)* and *skn-1(zu135); cebp-1(tm2807)* on *P. aeruginosa* PA14.  $p < 0.0001$  for wild type compared to *skn-1* and *skn-1; cebp-1* and for *cebp-1* compared to *skn-1* and *skn-1; cebp-1*.  $p = ns$  for wild type compared to *cebp-1* and for *skn-1* compared to *skn-1; cebp-1*. **(C)** Survival curves of wild type, *skn-1*, *skn-1; nipi-3*, *skn-1; cebp-1*, *skn-1; nipi-3 cebp-1* on *P. aeruginosa* PA14.  $p < 0.0001$  for wild type compared to all strains.  $p = ns$  for comparisons between all strains except wild type. For the survival experiments, animals were exposed to *P. aeruginosa* after treatment with *cdc-25.1* RNAi. Killing assays were performed in triplicate and repeated independently three times. Sample sizes, median survival, and p values of all trials are shown in Tables S1. **(D & E)** The defect in *gcs-1* **(D)** and *gst-4* **(E)** expression levels in the *nipi-3* background are suppressed by loss of *cebp-1* as revealed by qRT-PCR. Wild type (N2), *nipi-3(fr4)*, *cebp-1(tm2807)* and *nipi-3(fr4) cebp-1(tm2807)* animals were collected following exposure to *P. aeruginosa* or *E. coli* for 8 hours. Gene expression values are relative to the *act-1* housekeeping gene, with the N2 animals exposed to *E. coli* set to 1. The data shown are the mean  $\pm$  SEM of the three independent experiments, each of which was performed in triplicate. \* $p < 0.05$ , \*\*\* $p < 0.001$ , ns not significant.

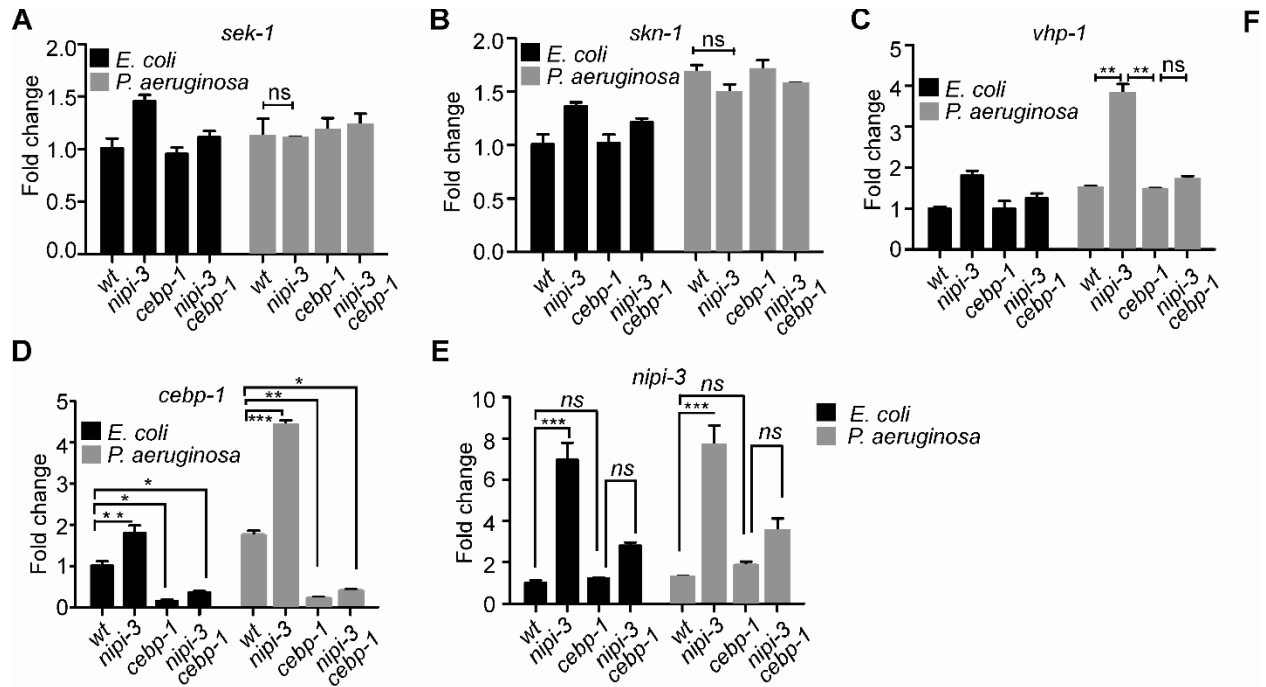

**Figures S4: CEBP-1 affects *vhp-1*, *cebp-1* and *nipi-3* transcript levels. Related to Figure 4.** qRT-PCR analysis of *sek-1* (A), *skn-1* (B), *vhp-1* (C), *cebp-1* (D), *nipi-3* (E) expression levels in animals of the indicated genotypes (wild type (N2), *nipi-3(fr4)*, *cebp-1(tm2807)*, *nipi-3(fr4) cebp-1(tm2807)*) exposed to *P. aeruginosa* or *E. coli* for 8 hours. The data shown are the mean  $\pm$  SEM of three independent experiments, each of which was performed triplicate. \* $p < 0.05$ , \*\* $p < 0.01$ , \*\*\* $p < 0.001$ , ns not significant.

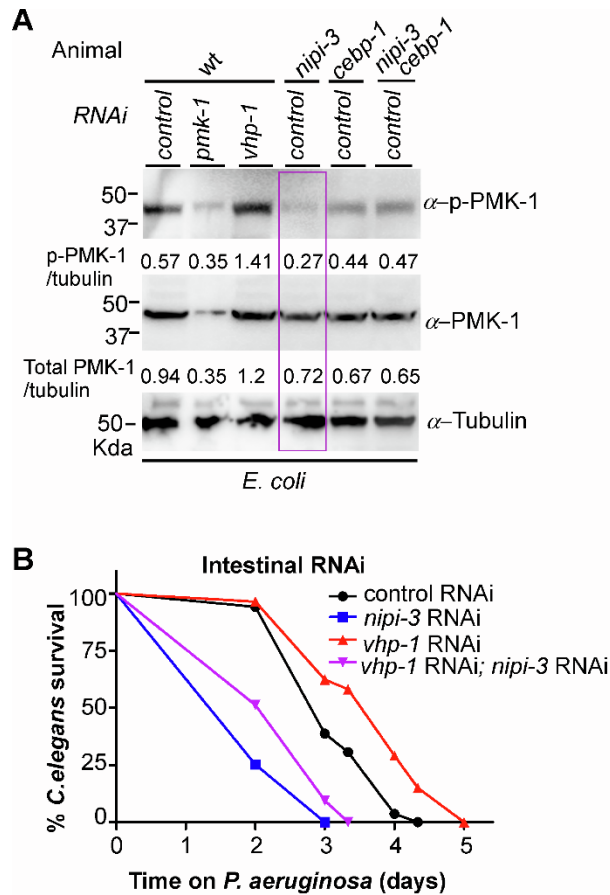

**Figure S5: NIPI-3 regulates the PMK-1 p38 MAPK pathway via the phosphatase VHP-1. Related to Figure 5. (A)** Loss of *nipi-3* results in lower levels of PMK-1 phosphorylation. Immunoblot analysis using an  $\alpha$ -phospho-p38 antibody, an  $\alpha$ -p38 antibody and an  $\alpha$ -tubulin antibody (loading control) from lysates of the indicated animals exposed to *E. coli* for 16 hours. Band intensities relative to  $\alpha$ -tubulin are indicated below each blot with the control set to 1. The lane containing the *nipi-3* lysate is boxed. **(B)** Epistasis analysis of intestine-only RNAi animals, either wild type or also containing the *pmk-1(ku25)* allele, exposed to *nipi-3* and *vhp-1* RNAi.  $p < 0.0001$  for all strain comparisons. **(C)** Epistasis analysis of intestine-only RNAi animals exposed to *nipi-3* RNAi in both wild type and *pmk-1(km25)* mutant backgrounds.  $p < 0.0001$  for all strain comparisons except for *pmk-1*; control RNAi to *pmk-1*; *nipi-3* RNAi, which is not significant. The VP303 background was used for all strains to enable intestinal specific RNAi, and *C. elegans* survival on *P. aeruginosa* was tracked over time. Data are representative of three trials. Sample sizes, median survival, and p values of all trials are shown in Table S1.

**TABLE S2. Oligonucleotides related to STAR methods and Key Resources Table.**

| REAGENT or RESOURCE                                                                                       | SOURCE        | IDENTIFIER |
|-----------------------------------------------------------------------------------------------------------|---------------|------------|
| Oligonucleotides                                                                                          |               |            |
| confirm <i>skn-1(zu135)</i> genotype FWD primer zu135-seq-F:<br>TTGTGGGGATTGAAGTGGGT                      | Sigma-Aldrich | N/A        |
| confirm <i>skn-1(zu135)</i> genotype REV primer zu135-seq-R:<br>CTCAAATAGGGCAAGTGGGT                      | Sigma-Aldrich | N/A        |
| confirm <i>nipi-3(fr4)</i> genotype FWD primer <i>nipi-3</i> seq-F:<br>CATCTCATCCATGACCGCTG               | Sigma-Aldrich | N/A        |
| confirm <i>nipi-3(fr4)</i> genotype REV primer <i>nipi-3</i> -seq-R:<br>TTGAACTGCAAACCTCCG                | Sigma-Aldrich | N/A        |
| confirm <i>pmk-1(km25)</i> genotype FWD primer <i>pmk-1</i> -F:<br>ACTTTCTCGTTAATCCTATAAGTTG              | Sigma-Aldrich | N/A        |
| confirm <i>pmk-1(km25)</i> genotype REV primer <i>pmk-1</i> -R:<br>TTTGATAGATCAGCTCCCATCAACAT TG          | Sigma-Aldrich | N/A        |
| confirm <i>skn-1(lax120)</i> genotype FWD primer <i>lax120</i> -F:<br>TGAAAAATAAAAAATGTTGAATG             | Sigma-Aldrich | N/A        |
| confirm <i>skn-1(lax120)</i> genotype REV primer <i>lax120</i> -R:<br>ATTGATAGTTGGAATGAGAAGGTAT AGG       | Sigma-Aldrich | N/A        |
| confirm <i>cebp-1(tm2807)</i> genotype FWD primer <i>cebp-1</i> -F:<br>GTTTGTACTTTCTTGCTCTGGTCTGTG G      | Sigma-Aldrich | N/A        |
| Confirm <i>cebp-1(tm2807)</i> genotype REV primer <i>cebp-1</i> -R:<br>ATATCTATTTTTTATCCATTTTCATAG TGTTGG | Sigma-Aldrich | N/A        |
| confirm intestinal special RNAi animals <i>rde-1(ne219)</i> -F:<br>TGTTCAATTACACTATTCACAAGCAT TGG         | Sigma-Aldrich | N/A        |
| confirm intestinal special RNAi animals <i>rde-1(ne219)</i> -R:<br>TTCAGGTCGAGATTGACAGAACG                | Sigma-Aldrich | N/A        |
| confirm <i>vhp-1(sa366)</i> genotype FWD primer <i>vhp-1</i> -F:<br>ATGAAAATGGGAAGCGATGATGCAT ACAG        | Sigma-Aldrich | N/A        |
| confirm <i>vhp-1(sa366)</i> genotype REV primer <i>vhp-1</i> -R:<br>ATTCTTGATGGAAGTCCAAGAGCTTT TGG        | Sigma-Aldrich | N/A        |

|                                                                               |               |     |
|-------------------------------------------------------------------------------|---------------|-----|
| qRT-PCR for <i>act-1</i> FWD primer RT-actin<br>F: CCATCATGAAGTGCACATTG       | Sigma-Aldrich | N/A |
| qRT-PCR for <i>act-1</i> REV primer RT-actin<br>R: CATGGTTGATGGGGCAAGAG       | Sigma-Aldrich | N/A |
| qRT-PCR for <i>cebp-1</i> FWD primer RT-<br>cebp-1 F: GCAAGACAAGACTCTCTTAC    | Sigma-Aldrich | N/A |
| qRT-PCR for <i>cebp-1</i> REV primer RT-<br>cebp-1 R: CCAAGGTCCAGCTCAGTTTC    | Sigma-Aldrich | N/A |
| qRT-PCR for <i>nipi-3</i> FWD primer RT-nipi-<br>3-F: GATGAAATCCGTTTAAAGCGAAC | Sigma-Aldrich | N/A |
| qRT-PCR for <i>nipi-3</i> REV primer RT-nipi-3-<br>R: GGCGTAGGAGTGAATTGTAG    | Sigma-Aldrich | N/A |
| qRT-PCR for <i>gcs-1</i> FWD primer RT-gcs-<br>1F: AATGCCTTACGGAGGTCTC        | Sigma-Aldrich | N/A |
| qRT-PCR for <i>gcs-1</i> REV primer RT-gcs-<br>1R: AAGAGATGGGAACGATATCG       | Sigma-Aldrich | N/A |
| qRT-PCR for <i>gst-4</i> FWD primer RT-gst-4<br>F: AAAGCTGAAGCCAACGACTC       | Sigma-Aldrich | N/A |
| qRT-PCR for <i>gst-4</i> REV primer RT-gst-4<br>R: TCTGCAGTTTTTCCAGCG         | Sigma-Aldrich | N/A |
| qRT-PCR for <i>vhp-1</i> FWD primer RT-vhp-<br>1-F: CCTCTACAACCATGTCTATCC     | Sigma-Aldrich | N/A |
| qRT-PCR for <i>vhp-1</i> REV primer RT-vhp-1-<br>R: CATGGTCTCATCCAAGCTATCA    | Sigma-Aldrich | N/A |
| qRT-PCR for <i>skn-1</i> FWD primer RT-skn1-<br>1F: CTGGCATCCTCTACCACCAC      | Sigma-Aldrich | N/A |
| qRT-PCR for <i>skn-1</i> REV primer RT-skn1-<br>1R:<br>TTGGTGATGATGGCCGTGTT   | Sigma-Aldrich | N/A |
| qRT-PCR for <i>sek-1</i> FWD primer RT-sek-<br>1F: CACTGTTTGGCGACGATGAG       | Sigma-Aldrich | N/A |
| qRT-PCR for <i>sek-1</i> REV primer RT-sek-<br>1R: ATTCCGTCCACGTTGCTGAT       | Sigma-Aldrich | N/A |
